# Supplementary material for: Microdevice integrating innate and adaptive immune responses associated with antigen presentation by dendritic cells
Source: Royal Society of Chemistry journal article supplement (doi:10.1039/c3ra41308j), 2013-01-01
Supplement: c3ra41308j.pdf [file c3ra41308j.pdf]

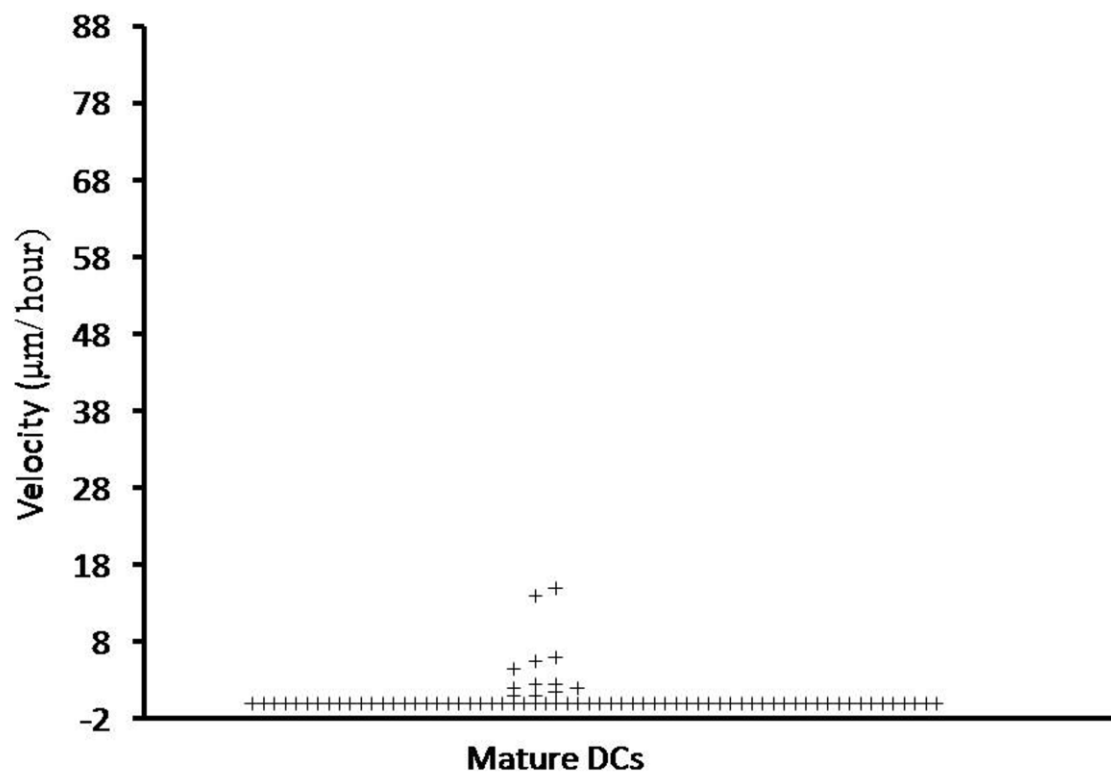

Figure S1: Velocity distribution of mDCs exposed to control medium on both sides of the chemotaxis channels (no chemokine gradient).
